# Supplementary material for: Dirty dances: academia-industry relations in Russia
Source: Springer Nature journal article supplement (doi:10.1186/s40604-015-0019-0), 2015-08-21
Supplement: MOESM1 [file 11901856]

## Dirty dances: academia-industry relations in Russia

### الرقصات القذرة: العلاقات بين الأوساط الأكاديمية والصناعة في روسيا

ظهرت العديد من الابتكارات التجارية الناجحة و المتأثية من البحوث الأساسية التي تجري في الجامعات. لا تزال الحدود الفاصلة بين العلوم البحتة والعلوم التطبيقية غير واضحة. وفي هذا السياق عملت الحكومات في جميع أنحاء العالم على تعزيز مفهوم التفاعل بين البحوث الأساسية المضطلع بها في المؤسسات الأكاديمية وتطبيق البحوث في القطاع التجاري.

كما حاولت الحكومات تطبيق نماذج مختلفة لتحديد الطريقة المثلى لتيسير هذه العلاقة بالاعتماد على التمويل من القطاع الخاص. تتناول هذه المقالة بالدرس الحالة الروسية وشرح آثار سياسة إنفاذ "الابتكار" التي وضعتها الحكومة الروسية في أواخر القرن الحادي والعشرين. وتوضح هذه الدراسة ان السياسة الروسية الحالية لها تأثيرات سلبية رغم وجود بعض الآثار الجانبية الإيجابية مثل الاستخدام المشترك للمعدات. تسمح هذه الطريقة بتنمية الثقة بين الشركة الخاصة والجامعة و الاستفادة المتبادلة من نتائج هذه الشراكة. كما تساهم في تغيير رؤية الشريك الأكاديمي لمجال الصناعة. ومن ثم، يمكن أن يكون لسياسة "الابتكار بالإكراه" في بعض الحالات نتائج إيجابية لأنها تحتم على الأوساط الأكاديمية والصناعة اعتبار أوجه التعاون المشترك كعنصر مساعد وليس كعائق.
